# Supplementary material
Source: PubMed Central journal article supplement (PMC4936404)
Supplement: NIHMS797833-supplement-Supplementary_Information.pdf [file NIHMS797833-supplement-Supplementary_Information.pdf]

**Tumor evolution and progression in multifocal and paired non-invasive/invasive urothelial carcinoma**

Joshua I. Warrick<sup>1^</sup>, Daniel H. Hovelson<sup>2^</sup>, Anmol Amin<sup>1</sup>, Chia-Jen Liu<sup>1</sup>, Andi K. Cani<sup>1</sup>, Andrew S. McDaniel<sup>1</sup>, Venkata Yadati<sup>1</sup>, Michael J. Quist<sup>1,7</sup>, Alon Z. Weizer<sup>5,6</sup>, J. Chad Brenner<sup>3</sup>, Felix Y. Feng<sup>4,5</sup>, Catherine S. Grasso<sup>1,7</sup>, Scott A. Tomlins<sup>1,5,6</sup>

**Supplementary Materials**

|                                    |               |
|------------------------------------|---------------|
| <b>Supplementary Figure Legend</b> | <b>Page 1</b> |
| <b>Supplementary Figure 1</b>      | <b>Page 2</b> |
| <b>Supplementary Table 1</b>       | <b>Page 3</b> |
| <b>Supplementary Table 2</b>       | <b>Page 4</b> |
| <b>Supplementary Table 3</b>       | <b>Page 5</b> |
| <b>Supplementary Table 4</b>       | <b>Page 6</b> |

**Figure S1: Macrodissection and sequencing of normal urothelium demonstrates lack of clonal founding mutations observed in multifocal tumors.** Two areas of histologically normal urothelium (BL193A and BL193B) from Case 1 were macrodissected and subjected to targeted DNA based next generation sequencing (NGS) using a custom Ion Torrent Ampliseq panel targeting ~130 genes. This panel covers two shared clonal mutations present in all multifocal urothelial carcinoma (UC) tumor specimens identified herein (*HRAS* Q61L and *PIK3CA* H1047L). **A-E.** Blocks with normal urothelium (20x original magnification in **A**, 2x in **B**) were cut, and unstained slides were visualized under a microscope (**C**), urothelium was identified (**D**) and macrodissected with confirmation of enrichment for urothelium (**E**). Original magnification 2x in **C-E** The read level support for the *HRAS* and *PIK3CA* mutations present in all tumor specimens is indicated. **F-J.** As in **A-E**, except for a second area of histologically normal urothelium from a separate block (BL193B).

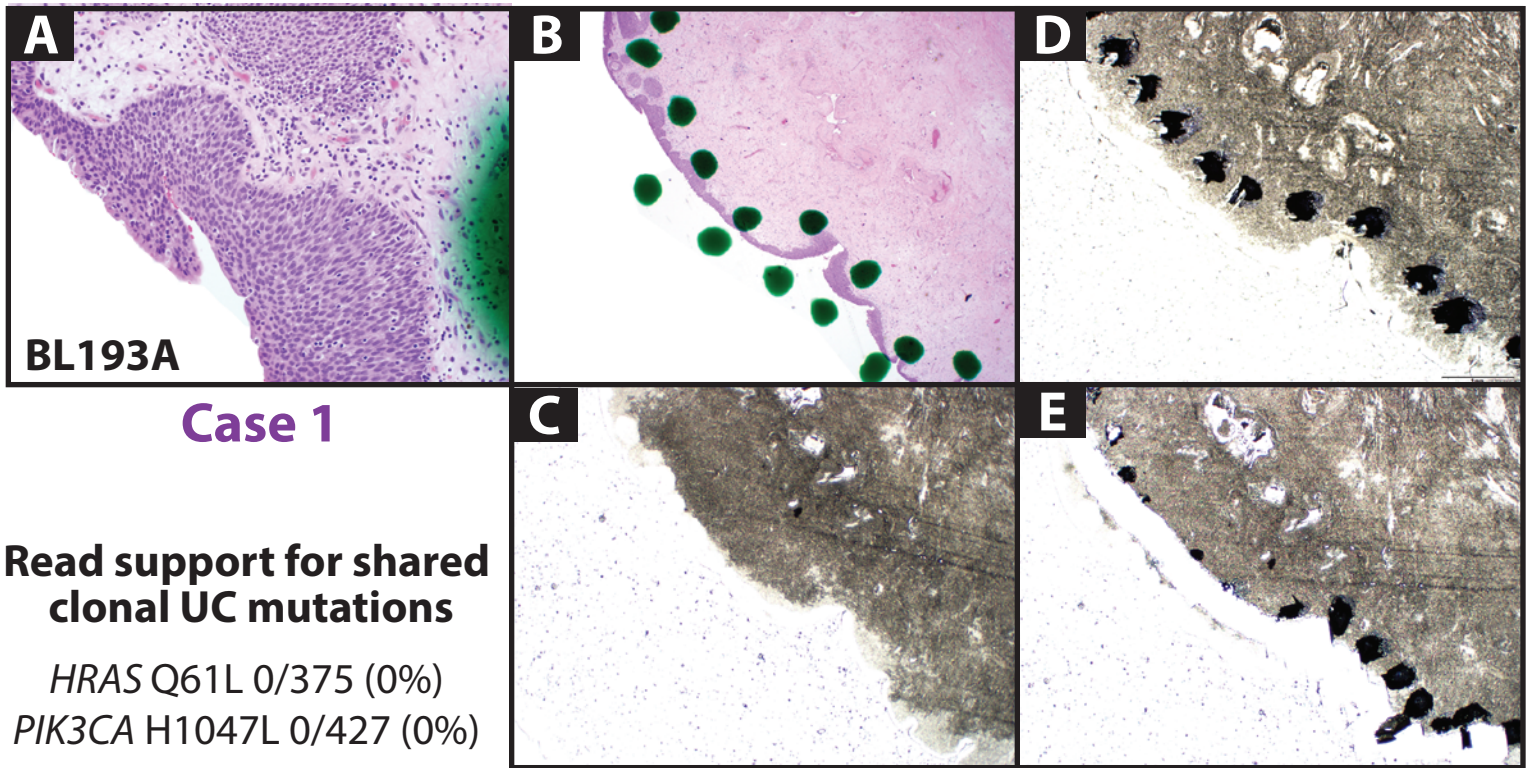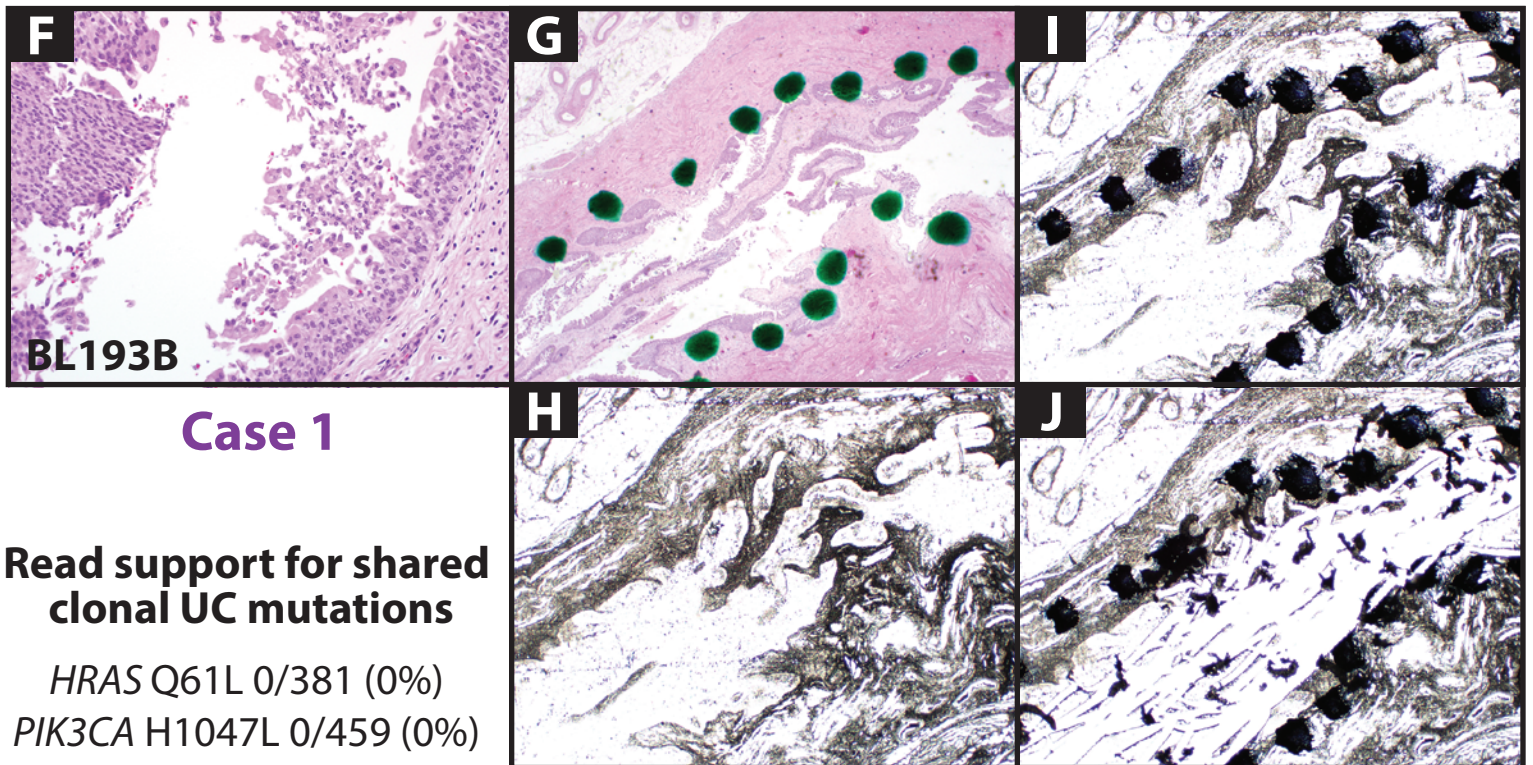

**Table S1: DNA next generation sequencing statistics for urothelial carcinoma samples**

| Sample  | Case | Type              | Estimated Tumor content | DNA isolated | Sequencer | Panel | Number of mapped reads | Percent reads on target <sup>1</sup> | Average base coverage depth | Uniformity of base coverage | Target base coverage at 1x | Target base coverage at 20x | Target base coverage at 100x | Variant Calls |
|---------|------|-------------------|-------------------------|--------------|-----------|-------|------------------------|--------------------------------------|-----------------------------|-----------------------------|----------------------------|-----------------------------|------------------------------|---------------|
| BL193   | 1    | Benign Kidney     | 0%                      | 1.83ug       | PGM       | CCP   | 6,162,548              | 99%                                  | 380                         | 90%                         | 99%                        | 96%                         | 87%                          | 1080          |
| BL191   | 1    | pTa               | 70%                     | 1.98ug       | PGM       | CCP   | 6,077,217              | 99%                                  | 377                         | 92%                         | 99%                        | 96%                         | 89%                          | 1088          |
| BL192   | 1    | pTa               | 70%                     | 1.07ug       | PGM       | CCP   | 4,483,190              | 99%                                  | 280                         | 90%                         | 99%                        | 95%                         | 82%                          | 1136          |
| BL194   | 1    | pTa               | 70%                     | 1.74ug       | PGM       | CCP   | 3,593,322              | 87%                                  | 179                         | 89%                         | 99%                        | 94%                         | 66%                          | 1190          |
| BL195   | 1    | pTa               | 70%                     | 1.58ug       | PGM       | CCP   | 5,731,464              | 99%                                  | 359                         | 80%                         | 98%                        | 89%                         | 76%                          | 1079          |
| BL196   | 1    | pTa               | 70%                     | 2.47ug       | PGM       | CCP   | 3,570,567              | 95%                                  | 212                         | 89%                         | 99%                        | 95%                         | 72%                          | 1103          |
| BL190   | 1    | > pTa             | 70%                     | 1.22ug       | PGM       | CCP   | 5,403,796              | 99%                                  | 342                         | 91%                         | 99%                        | 96%                         | 86%                          | 1288          |
| BL300   | 2    | pTa               | 75%                     | 1.16ug       | Proton    | CCP   | 33,863,024             | 99%                                  | 2102                        | 89%                         | 100%                       | 98%                         | 96%                          | 1199          |
| BL301   | 2    | > pTa             | 40%                     | 2.31ug       | Proton    | CCP   | 5,441,489              | 99%                                  | 328                         | 87%                         | 99%                        | 94%                         | 81%                          | 1058          |
| BL303mn | 3    | Benign Urothelium | 0%                      | 0.40ug       | Proton    | CCP   | 5,758,432              | 99%                                  | 346                         | 86%                         | 99%                        | 95%                         | 80%                          | 1068          |
| BL302   | 3    | pTa               | 75%                     | 3.35ug       | Proton    | CCP   | 7,505,325              | 99%                                  | 456                         | 89%                         | 99%                        | 96%                         | 88%                          | 1158          |
| BL303   | 3    | > pTa             | 75%                     | 1.35ug       | Proton    | CCP   | 6,595,021              | 99%                                  | 407                         | 89%                         | 99%                        | 96%                         | 87%                          | 1096          |
| BL305   | 4    | pTa               | 80%                     | 1.22ug       | Proton    | CCP   | 2,764,767              | 99%                                  | 163                         | 82%                         | 98%                        | 88%                         | 51%                          | 807           |
| BL306   | 4    | > pTa             | 70%                     | 3.88ug       | Proton    | CCP   | 3,708,029              | 99%                                  | 224                         | 87%                         | 99%                        | 93%                         | 70%                          | 911           |

For each sample, the Case and whether the sample represented benign tissue, pTa or > pTa urothelial carcinoma is indicated. For Case 1, each sample was sequenced on a single Ion Torrent 318 chip on the PGM. For Cases 2-4, samples were multiplexed and sequenced on Ion PI chips on the Proton Sequencer.<sup>1</sup>The comprehensive cancer panel (CCP) targets 1,688,650 bases in 409 genes.



**Table S3. Targeted multiplexed PCR based RNA sequencing statistics for urothelial carcinoma samples**

| Sample  | Case | Type              | RNA isolated | Sequencer | Mapped Reads <sup>1</sup> | On Target | Amplicons with at least 10 reads |
|---------|------|-------------------|--------------|-----------|---------------------------|-----------|----------------------------------|
| BL193A* | 1    | Benign Urothelium | 0.66ug       | PGM       | 495,367                   | 1         | 105                              |
| BL193B* | 1    | Benign Urothelium | 1.04ug       | PGM       | 449,622                   | 1         | 106                              |
| BL190   | 1    | > pTa             | 2.30ug       | PGM       | 174,513                   | 1         | 104                              |
| BL191   | 1    | pTa               | 3.86ug       | PGM       | 527,004                   | 1         | 105                              |
| BL192   | 1    | pTa               | 1.40ug       | PGM       | 329,882                   | 1         | 106                              |
| BL194   | 1    | pTa               | 1.86ug       | PGM       | 549,018                   | 1         | 107                              |
| BL195   | 1    | pTa               | 2.21ug       | PGM       | 479,483                   | 1         | 107                              |
| BL196   | 1    | pTa               | 2.01ug       | PGM       | 410,994                   | 1         | 108                              |
| BL300   | 2    | pTa               | 3.58ug       | PGM       | 349,796                   | 1         | 104                              |
| BL301   | 2    | > pTa             | 0.40ug       | PGM       | 272,113                   | 1         | 106                              |
| BL303mn | 3    | Benign Urothelium | 2.48ug       | PGM       | 289,895                   | 1         | 109                              |
| BL302^  | 3    | pTa               | 6.80ug       | PGM       | 500,996                   | 1         | 108                              |
| BL302b^ | 3    | pTa               | N/A          | PGM       | 392,154                   | 1         | 105                              |
| BL303   | 3    | > pTa             | 1.30ug       | PGM       | 278,034                   | 1         | 105                              |
| BL305^  | 4    | pTa               | 0.68ug       | PGM       | 470,339                   | 1         | 99                               |
| BL305b^ | 4    | pTa               | N/A          | PGM       | 512,697                   | 1         | 100                              |
| BL306   | 4    | > pTa             | 0.10ug       | PGM       | 60,836                    | 1         | 91                               |

For each sample, the Case and whether the sample represented benign urothelium, pTa or > pTa urothelial carcinoma is indicated. Samples were multiplexed and sequenced on Ion Torrent 318 chips. \* indicates biological replicates from different blocks. ^ indicates technical replicates, with "b" samples subjected to 3 extra cycles during multiplexed PCR. <sup>1</sup>The custom RNA Ampliseq panel consisted of 111 amplicons targeting 8 housekeeping genes and 103 target genes.
